# Supplementary material for: Identification and Characterization of Plasmids and Genes from Carbapenemase-Producing Klebsiella pneumoniae in Makkah Province, Saudi Arabia
Source: MDPI journal article supplement (doi:10.3390/antibiotics11111627), 2022-11-15
Supplement: s1 [file s1]

# Supplementary Materials

## S1. Biofilm Formation of *K. pneumoniae*

**Table S1.** The raw data and biofilm formation level of all 23 *K. pneumoniae* isolates, along with the ATCC reference strain (700603).

| Isolate No. | Average | SD    | Biofilm Level | Isolate No. | Average | SD    | Biofilm Level |
|-------------|---------|-------|---------------|-------------|---------|-------|---------------|
| 1           | 0.097   | 0.006 | Weak          | 14          | 0.130   | 0.003 | Moderate      |
| 2           | 0.129   | 0.062 | Moderate      | 15          | 0.120   | 0.003 | Weak          |
| 3           | 0.056   | 0.001 | No Biofilm    | 16          | 0.058   | 0.003 | No Biofilm    |
| 4           | 0.072   | 0.003 | Weak          | 17          | 0.057   | 0.001 | No Biofilm    |
| 5           | 0.096   | 0.021 | Weak          | 18          | 0.056   | 0.002 | No Biofilm    |
| 6           | 0.114   | 0.005 | Weak          | 19          | 0.056   | 0.001 | No Biofilm    |
| 7           | 0.106   | 0.004 | Weak          | 20          | 0.057   | 0.001 | No Biofilm    |
| 8           | 0.096   | 0.020 | Weak          | 21          | 0.058   | 0.001 | No Biofilm    |
| 9           | 0.055   | 0.002 | No Biofilm    | 22          | 0.077   | 0.007 | Weak          |
| 10          | 0.136   | 0.009 | Moderate      | 23          | 0.054   | 0.001 | No Biofilm    |
| 11          | 0.071   | 0.021 | Weak          | ATCC 700603 | 0.153   | 0.004 | Moderate      |
| 12          | 0.099   | 0.012 | Weak          | Negative    | 0.057   | 0.002 | No Biofilm    |
| 13          | 0.119   | 0.031 | Weak          |             |         |       |               |

## S2. Detection of Plasmids by PCR-Based Replicon Typing (PBRT)

**Table S2.** Detailed results of all replicons appeared in all 23 *K. pneumoniae* isolates.

| Sample | Replicons                                                | Total of plasmid |
|--------|----------------------------------------------------------|------------------|
| K1     | I1Y, FIIK, FIB KQ, FII                                   | 4                |
| K2     | I1Y, FIIK, FIB KQ, IncA/C L, HIB-M                       | 5                |
| K3     | I1Y, FIB-M, FIB KN, R, HIB-M                             | 5                |
| K4     | I1Y, FIIK, FIB KQ, , HIB-M                               | 5                |
| K5     |                                                          | 0                |
| K6     | FIIK                                                     | 1                |
| K7     |                                                          | 0                |
| K8     | FIIK                                                     | 1                |
| K9     | A/C                                                      | 1                |
| K10    | FIIK                                                     | 1                |
| K11    |                                                          | 0                |
| K12    | FIB KQ                                                   | 1                |
| K13    | FIIK, FII                                                | 0                |
| K14    | FII, FIIK                                                | 2                |
| K15    | I1Y, R, FIB KQ, A/C, FIIS, FII                           | 6                |
| K16    | I1Y, N2, IncW L, A/C, FIIS, U, FII                       | 7                |
| K17    | I1Y, X1, IncW L, A/C, FIIS, FIB KN, FIB-M, HIB-M         | 8                |
| K18    | I1Y, X1, IncW L, A/C, FIIS, FIB KN, FIB-M, R, HI3, HIB-M | 10               |
| K19    | I1Y, X1, IncW L, A/C, FIIS, FIB KN, FIB-M, FIIK, HIB-M   | 9                |
| K20    | I1Y, X1, IncW L, A/C, FIIS, FIB KN, FIB-M, HIB-M         | 8                |
| K21    | I1Y, X1, IncW L, A/C, FIIS, FIB KN, FIB-M, HIB-M         | 8                |

|            |                                                      |   |
|------------|------------------------------------------------------|---|
| <b>K22</b> | <i>I1Y, N2, IncW L, A/C, FIIS, FIHK, FII, FIB KQ</i> | 8 |
| <b>K23</b> | <i>I1Y, FIHK, FIB KN, FIB-M, HIB-M</i>               | 5 |
